# Supplementary material for: Challenges and opportunities in cancer immunotherapy: a Society for Immunotherapy of Cancer (SITC) strategic vision
Source: PubMed Central journal article supplement — J Immunother Cancer. 2024 Jun 19;12(6):e009063. doi: 10.1136/jitc-2024-009063 (PMC11191773; doi:10.1136/jitc-2024-009063), 2024-06-19
Supplement: jitc-2024-009063supp001.pdf [file jitc-2024-009063supp001.pdf]

### Society for Immunotherapy of Cancer 2023 Strategic Retreat Attendees and SITC Support Staff

| Name                                        | Affiliation                                            |
|---------------------------------------------|--------------------------------------------------------|
| <b>Strategic Retreat Attendees</b>          |                                                        |
| Liliana Alfaya, PhD                         | Kite, A Gilead Company                                 |
| Julie R. Brahmer, MD                        | Sidney Kimmel Cancer Center, Johns Hopkins University  |
| Tullia C. Bruno, PhD                        | University of Pittsburgh                               |
| Christian M. Capitini, MD                   | University of Wisconsin-Madison                        |
| Ana Carrizosa Anderson, PhD                 | Harvard Medical School                                 |
| Daniel S Chen, MD, PhD                      | Engenuity Life Sciences                                |
| Deb Collyar, BSc                            | Patient Advocates In Research (PAIR)                   |
| Ivan Diaz-Padilla, MD, PhD                  | GSK                                                    |
| Leisha A. Emens, MD, PhD                    | Ankyra Therapeutics                                    |
| Marc S. Ernstoff, MD                        | National Cancer Institute                              |
| Dmitry Gabrilovich, MD, PhD                 | AstraZeneca                                            |
| Charlie Garnett-Benson, PhD                 | Bristol-Myers Squibb                                   |
| James L. Gulley, MD, PhD, FACP              | National Cancer Institute                              |
| Patrick Hwu, MD                             | Moffitt Cancer Center                                  |
| Elizabeth M. Jaffee, MD                     | Sidney Kimmel Cancer Center, Johns Hopkins University  |
| Maria Karasarides, PhD                      | Bristol-Myers Squibb                                   |
| Harriet Kluger, MD                          | Yale University                                        |
| Jason J. Luke, MD, FACP                     | UPMC Hillman Cancer Center                             |
| Saman Maleki, PhD                           | Western University                                     |
| Chrystal M. Paulos, PhD                     | Winship Cancer Institute at Emory University           |
| Avery D. Posey Jr., PhD                     | University of Pennsylvania Perelman School of Medicine |
| Pedro Romero, MD                            | Novigenix                                              |
| Padmanee Sharma, MD, PhD                    | The University of Texas MD Anderson Cancer Center      |
| Ann W. Silk, MD, MS                         | Dana-Farber Cancer Institute                           |
| Zhen Su, MD, MBA                            | Marengo Therapeutics                                   |
| Ryan J. Sullivan, MD                        | Harvard Medical School, Massachusetts General Hospital |
| Marc Theoret, MD                            | Food and Drug Administration (FDA)                     |
| Claire I. Vanpouille-Box, PhD               | Weill Cornell Medicine                                 |
| Jennifer A. Wargo, MD, MMSc                 | The University of Texas MD Anderson Cancer Center      |
| Sarah Warren, PhD                           | Kite, A Gilead Company                                 |
| Jedd D. Wolchok, MD, PhD                    | Weill Cornell Medicine                                 |
| <b>SITC Strategic Retreat Support Staff</b> |                                                        |
| Mary Dean, JD, CAE                          |                                                        |
| Terri Holzen, PhD                           |                                                        |
| Patrick Humpal, MPA                         |                                                        |

|                                                                           |  |
|---------------------------------------------------------------------------|--|
| Peter Intile, PhD                                                         |  |
| Angela Kilbert                                                            |  |
| Christina Mooney                                                          |  |
| Alicia Schuessler, CAE                                                    |  |
| Tara Withington, CAE                                                      |  |
|                                                                           |  |
| <b>SITC Manuscript Development<br/>Support Staff – Project Management</b> |  |
| Mary Dean, JD, CAE                                                        |  |
| Angela Kilbert                                                            |  |
| Nichole Larson                                                            |  |
| Jawahara Waqar                                                            |  |
